# Supplementary material for: A global genotyping survey of Strongyloides stercoralis and Strongyloides fuelleborni using deep amplicon sequencing
Source: PubMed Central journal article supplement (PMC6762204; doi:10.1371/journal.pntd.0007609), 2019-09-16

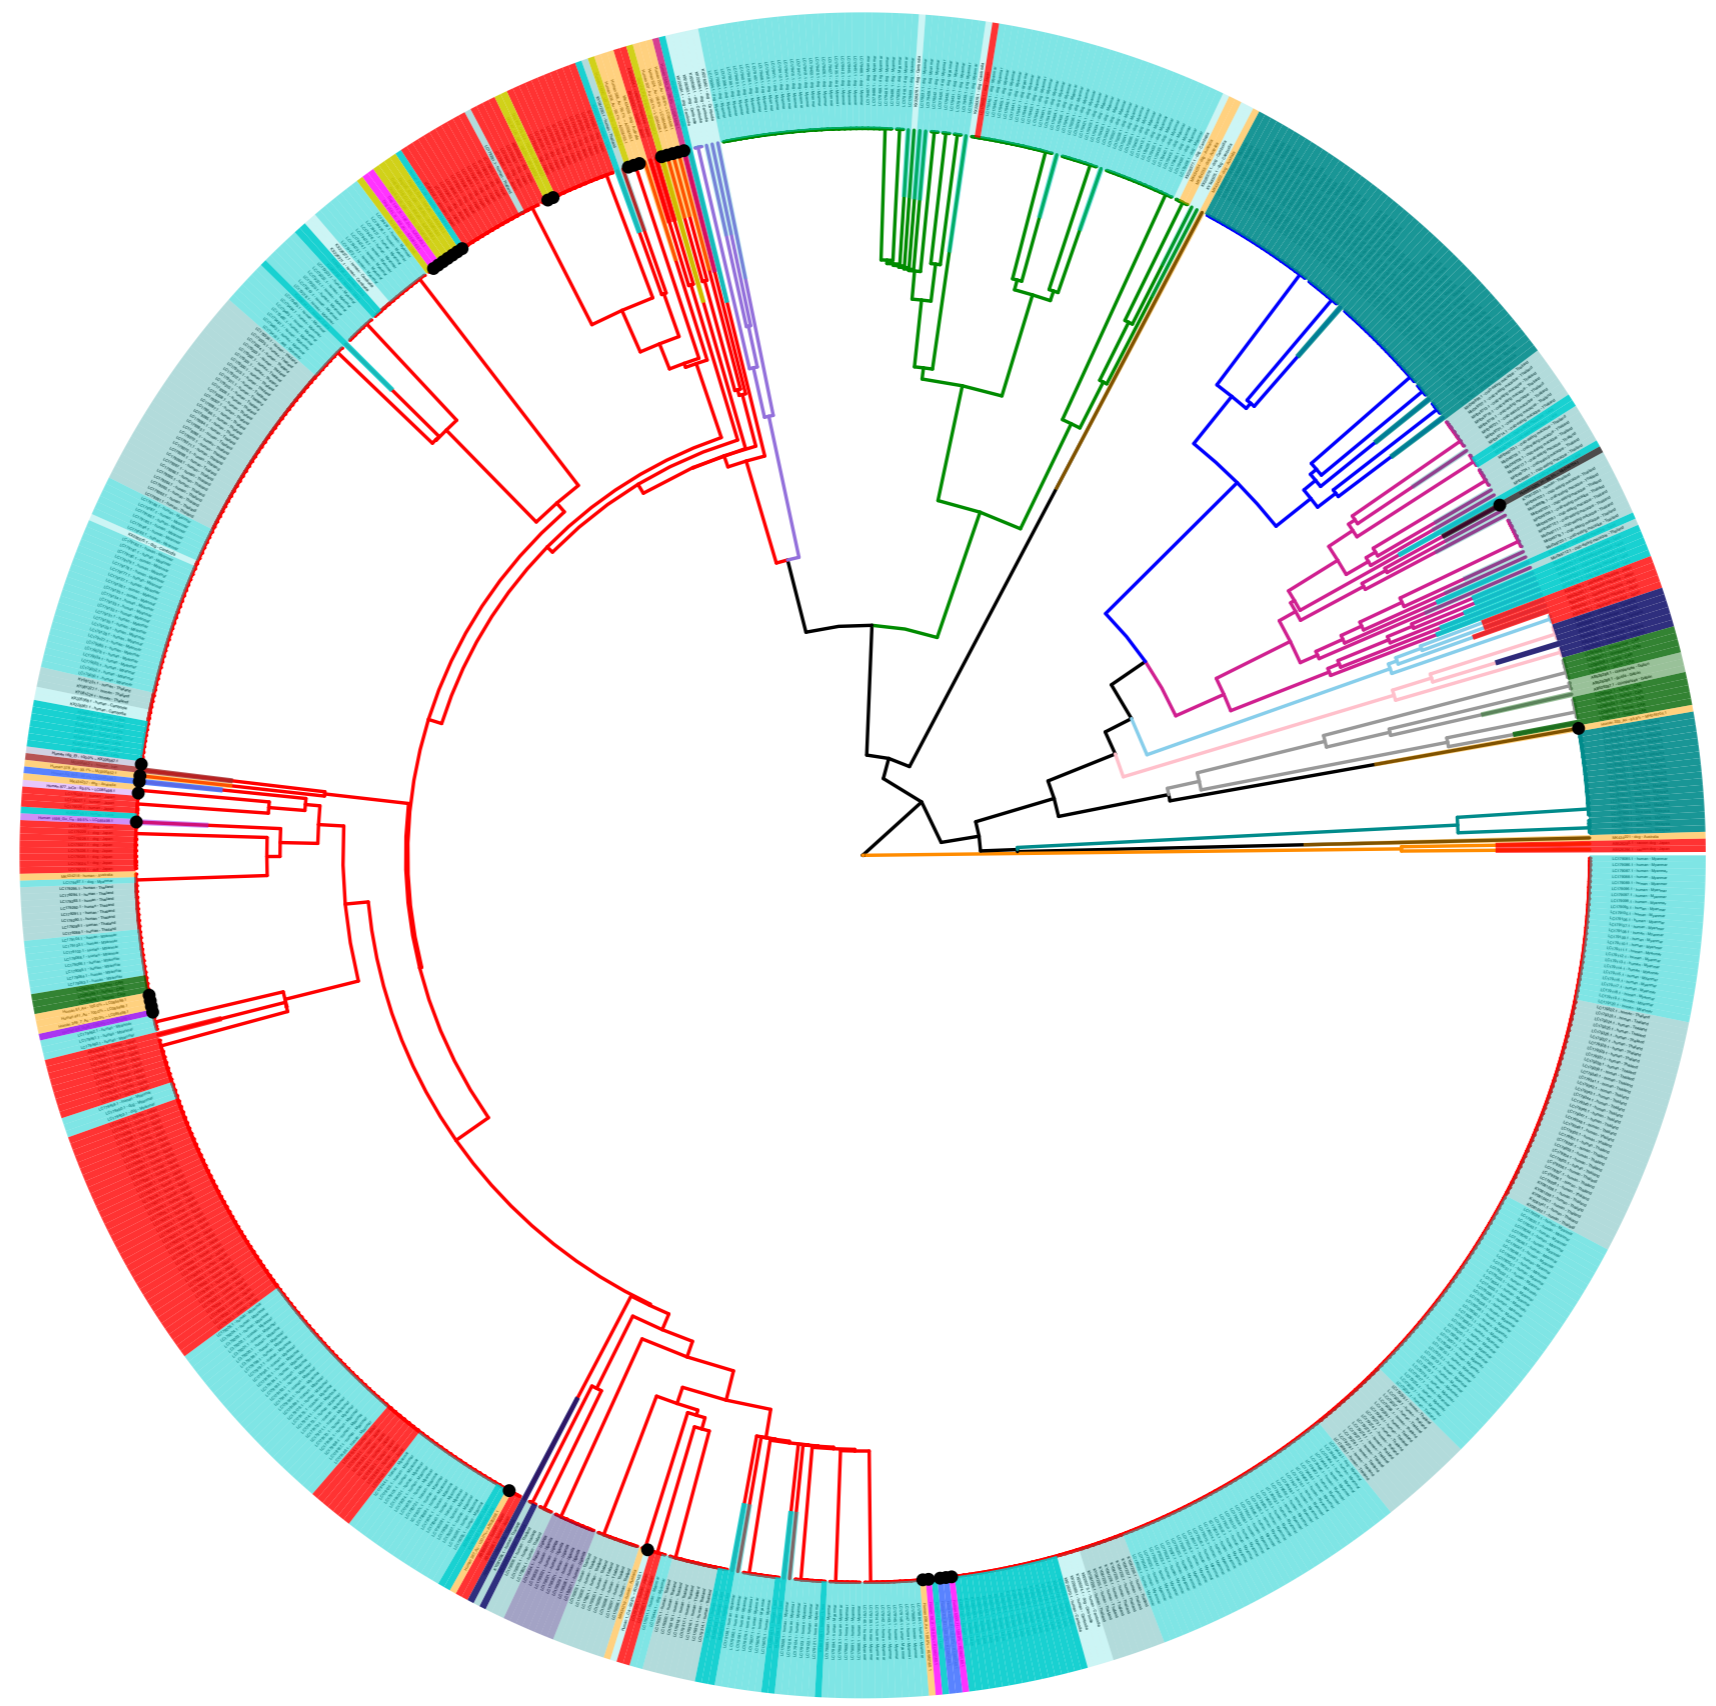

Supplement: pntd.0007609.s001.pdf [file pntd.0007609.s001.pdf]
